# Supplementary material
Source: PubMed Central journal article supplement (PMC5777070)
Supplement: pnas.1717125115.sapp.pdf [file pnas.1717125115.sapp.pdf]

## **Supporting Information Appendix**

### **SI Materials and Methods**

**Patients.** From 2007 to 2016, 61 adults T-ALL patients were diagnosed in RuiJin Hospital Affiliated to Shanghai JiaoTong University School of Medicine, the First Affiliated Hospital of Soochow University, and the Fujian medical University Union Hospital, and 69 pediatric T-ALL patients were diagnosed in Shanghai Children's Medical Center according to the WHO criteria. All the data were re-reviewed by the evaluation group of Shanghai Institute of Hematology (SIH). The study was approved by the ethical board of the participating centers. All patients were given informed consent for both treatment and cryopreservation of bone marrow (BM) and peripheral blood samples according to the Declaration of Helsinki.

**Treatment.** Adult patients in discovery cohort were mostly enrolled in an SIH protocol (Chinese Clinical Trial Registry, number ChiCTR-RNC-14004969 for sample collection and ChiCTR-ONRC-14004968 for treatment respectively), which was a protocol similar to CALGB 8811 induction chemotherapy (Larson regimen), based on a modification of M.D. Anderson consolidation regimen (Hyper-CVAD, alternating with high-dose methotrexate and cytarabine for 4 cycles)(1, 2). We carried on weekly methotrexate, daily 6-MP and monthly vincristine/prednisone pulses for 2 years as maintenance regimen.

Pediatric patients in discovery cohort were mostly enrolled in the Shanghai Children's Medical Center ALL-2005 protocol (Chinese Clinical Trial Registry, number ChiCTR-ONC-14005003). This protocol was a modified ALL-XH-99 regimen(3). The most important change was to move the high-dose Ara-C from the consolidation treatment to the later maintenance in the intermediate-risk and high-risk groups, whereas conventional dosage (Ara-C 100 mg/m<sup>2</sup>/day, q12h, H, d1-7) was still used in the consolidation treatment in low-risk group(4).

**RNA sequencing alignment.** RNA sequencing were performed in all 130 patients according to previously described method(5). RNA-seq data were aligned against the human reference genome hg19 using Hisat2 (Version 2.0.5)(6). HTSeq was used to generate a counts table from Hisat2 output(7).

**Fusion detection by RNA-seq and confirmation using Reverse transcription polymerase chain reaction (RT-PCR).** FusionCatcher (Version 0.99.3d)(8) and Defuse (Version 0.6.2)(9) were used for finding somatic fusion genes such that there were at least 2 split reads and 3 spanning reads in the analyzed RNA-seq data. RT-PCR was performed to examine the newly identified fusion genes which had not been previously reported and 18 novel fusions were confirmed. For the fusions that may result in fusion proteins, we further estimated their impact to the ORFs based on the predicted break points and adjacent sequences.

**Whole exome sequencing alignment.** Whole exome sequencing was performed in 36 patients without fusion genes, 16 individuals having their own normal control samples (blood samples in CR). Read pairs were aligned to the human reference genome (hg19, downloaded from the UCSC Genome Browser) by BWA (version 0.7.15-r1140). Samtools (version 1.3) were applied to generate chromosomal coordinate-sorted bam files. Alignment files were processed further with the Picard (version 1.138) and GATK before variant calling. Duplicate removal, local realignment around known indels and base quality recalibration were performed. These data were compared to RNA-seq data from the same samples from 36 cases. Among genes with mutation rates >3%, 123/125 (98.4%) of the sequencing variations detected in RNA-seq were also found in WES, confirming the validity of our RNA-seq based mutation calling system.

**Mutation calling from RNA-seq data.** A recent publication using RNA-seq to identify mutations in a large B-ALL series was taken as reference(10, 11). As in their reports, several gene mutations (like *NOTCH1*, *FBXW7*, *PTEN*, *NRAS*, *KRAS*, *JAK2*, *IKZF1*, *CREBBP*, *RPL10* etc.) were found using RNA-seq and confirmed by partial WES or Sanger sequencing. Based on RNA-seq and WES data from our previous work or public database, more stringent procedure to rule out rare SNPs were applied in this study. The mutations were called according to the GATK forum recommended pipeline for calling variant in RNA-seq data(12). Specifically, STAR (version 2.5.2b) mapped bam files were processed by Picard(13). Variant calling was performed by the HaplotypeCaller, UnifiedGenotyper module in GATK, VarScan2 and LoFreq(14, 15), then the variants were quality controlled by the following steps: (1) at least three reads supported the mutation and the mutant allele frequency was >5% or be validated by Sanger sequencing; (2) not observed in common dbSNP 147 database or presented in the 1000 Genomes Project database; (3) sequence variation frequency  $\leq 2$  in normal control samples [blood in complete remission (CR), saliva, and skin tissues] from 265 ALL and lymphoma cases in our previous publications(5, 16) and this work; (4) supported by double strand of the genome; (5) not found in DARNED and RADAR RNA-editing database(17, 18). After filtering, all the mutations were annotated to genes according to their genomic positions. Non-silent mutations were compared to v70 COSMIC somatic mutation database (GRCh37) for the overlapped cancer relevant genes, and to the literature for genes mutated in T-ALL(19-22).

In 36 cases with WES data, 95.5% of recurrent gene abnormalities including loss-of-function mutations in TSGs of WES data were also found by RNA-seq analysis, suggesting no obvious decay of genetic information in the latter setting in T-ALL.

**Gene expression and pathway analysis.** The mRNA expression levels in transcriptome sequencing data were estimated as FPKM values. Briefly, read counts in the corresponding GENCODE annotated gene model were obtained with the HTseq-count program. FPKM values were computed by normalizing the obtained read counts for a transcript or gene with the length of the transcript or gene and the total mapped reads. All gene expression data from RNA-seq experiments were normalized together using variance stabilizing transformation in the DESeq2 package to remove any technical or spurious background variation(23). The top 1,484 genes (about 10 percent) were selected only based on the highest variability of gene expression across samples. Unsupervised hierarchical clustering was performed with ward method in R “gplots” package. The distance was based on the Pearson correlation coefficient.

**RNA splicing and aberrant transcript analysis.** Read counting was performed using HTSeq-count 0.9.1 ([http://htseq.readthedocs.io/en/release\\_0.9.1/](http://htseq.readthedocs.io/en/release_0.9.1/)) with custom Python scripts provided by the DEXSeq(24). Read count tables and group comparisons for differential exon or transcript usage were performed with DEXSeq. Exon bins after the quantification has been filtered to improve reliability of differential exon usage. The filter method was according to previous published paper (25).

**Multiplex ligation-dependent probe amplification (MLPA).** Multiplex ligation-dependent probe amplification is an attractive property for copy number variation analysis (26). Hybridization and ligation steps were performed on 100 ng genomic DNA, and probes were subjected to PCR reactions using SALSA ME024 9q21 *CDKN2A/2B* region probemix according to the manufacturer's instructions (MRC-Holland). Targeted loci included 9p21 region encompassing the *CDKN2A/2B* gene. Products were run on ABI 3730XL genetic analyzer.

**SNP array analysis.** Total genomic DNA (200ng) was amplified, randomly fragmented and hybridized to Affymetrix Axiom 2.0 Assay according to the manufacturer's protocol. The hybridization, washing and scanning were completed in the Affymetrix GeneTitan MC instrument. The raw data (\*.CEL) files were analyzed using the Axiom™ Analysis Suite (Version 2.0.0.35) of Affymetrix. Log R Ratio (LRR) and B Allele Frequency (BAF) were calculated by Axiom CNV Tool (Version 1.1.0.85). Affymetrix official annotation file (Axiom\_PMRA.na35.annot.db) was combined as the input data. The output file (\*.PennCNV) were analyzed by PennCNV (Version 1.0.3) and GFD(27).

**Plasmid construction.** The wild-type *ZBTB16* and *ABL1* cDNA clones were kindly provided by OriGene. The *ZBTB16-ABL1* fusion cDNA was constructed into the XhoI and EcoRI multiple cloning sites of retroviral vector MSCV-IRES-GFP (Migr1). All recombinant plasmids were verified by DNA sequencing.

**Cell transfection.** Purified plasmids Migr1-vector or Migr1-*ZBTB16-ABL1* were cotransfected into HEK-293T cells with packaging vectors with Lipofectamine 2000 (Invitrogen) according to the manufacturer's protocol. The HEK-293T cell culture supernatants were then concentrated to a viral concentration of approximately  $3 \times 10^8$  TU/ml. The viral particles were incubated with Jurkat cells for 4 h. The stably transfected clones were selected by GFP.

**Cell proliferation assay.** The stably transfected Jurkat cells were seeded in 96-well plates at a certain density per well. After incubation for 48 hours, cell proliferation was monitored by using the CellTiter-Glo® Luminescent Cell Viability Assay (Promega Corporation) following the manufacturer's instruction.

**Cell cycle analysis.** The stably transfected Jurkat cells were fixed in cold 70% ethanol, washed once in PBS, and re-suspended in PBS supplemented with 100 µg/ml DNase-free RNase A (QIAGEN) and 100 µg/ml propidium iodide (PI)

(Sigma). Samples were processed using the LSR Fortessa™ X-20 flow cytometer (BD Biosciences) according to the manufacturers' instructions.

**Protein tyrosine kinase assay.** ABL1, ZBTB16-ABL1 (ZA) and BCR-ABL (BA) tyrosine kinase activity were measured using universal tyrosine kinase assay kit (Takara) according to the manufacturer's instructions. Briefly, the HEK-293T cells were transfected with Migr1-vector, Migr1-ZBTB16-ABL1 or Migr1-BCR-ABL (provided by Jian-Hua Mao, Shanghai Institute of Hematology) plasmids. Cell lysates were prepared and the ABL1 antibody (Cell Signaling, 2862; 1:100 dilution) was used for immunoprecipitation. Agarose beads conjugated with protein A/G were added. The amounts of ABL1 proteins of ABL1, ZA and BA were normalized and the immunoprecipitates were then incubated with ATP-2Na in immobilized wells. Horseradish peroxidase-conjugated antiphosphotyrosine (PY20) antibody was added to each well and developed by addition of HRP substrate solution (TMBZ). The reaction was stopped with 1N H<sub>2</sub>SO<sub>4</sub> and absorbance was measured at 450 nm on a spectrophotometer. Each test was triplicated and the results were calibrated with a corresponding phosphopeptide standard curve and control.

**Cellular drug inhibition assay.** Imatinib and dasatinib were purchased from Selleck. Both drugs were stored at -20°C as a 10mM stock solution in dimethyl sulfoxide (DMSO). The stably transfected Jurkat cells were plated at 1×10<sup>4</sup> cells per well in 96-well plates in PRMI-1640 medium supplemented with 10% heat-inactivated FBS. TKIs were included in media at increasing concentrations. Viable cell number was assessed 48h postplating using the CellTiter-Glo Luminescent Cell Viability Assay (Promega) according to the manufacturer's instructions. All experiments were performed intriplicate.

**Mouse keeping, retrovirus packaging, BM transplantation.** Mice used in this study were housed in the specific pathogen free circumstance in Research

Center for Experimental Medicine in RuiJin Hospital Affiliated to Shanghai Jiao Tong University School of Medicine. Male BALB/c mice (aged 6–8 weeks,  $n=10$ ) and female BALB/c mice (aged 6–8 weeks,  $n=20$ ) were raised in a temperature ( $22\pm 1^\circ\text{C}$ ) and humidity ( $55\pm 5\%$ ) controlled room with 12 hours of light and 12 hours of dark a day. All animal experiments were conducted following the institutional ethical guidelines on animal care and were approved by the Animal Care and Use Committee of Shanghai Jiao Tong University School of Medicine. Retroviral supernatants were generated by co-transfecting 293T cells with recombinant plasmids and ecopac retroviral packaging plasmid using Lipofectamine 2000 (Invitrogen). BM cells were isolated from male BALB/c mice that received 5-fluorouracil (250 mg/kg) 5 days before harvest. The primary murine BM cells were then infected once a day for 2 days with a retroviruses mixture consisting of DMEM supplemented with 15% FBS, IL-3 (10 ng/mL), IL-6 (10 ng/mL), IL-7 (10 ng/mL), Flt3L (10 ng/mL), SCF (50 ng/mL) and polybrene (5ug/mL). All cytokines were obtained from R&D Systems. After 24-hour infection, cells were randomly injected into lethally irradiated recipient female BALB/c mice through the tail vein ( $n=10$  for each group). Two weeks after transplantation, peripheral blood was collected to analyze the percentage of GFP positive cells to evaluate the efficiency of transplantation.

***In vivo* treatment studies.** The primary bone marrow transplantation mouse model was used. Dasatinib or imatinib treatment was started 10 days after transplantation. Imatinib was dissolved at 10 mM in 100% dimethyl sulfoxide (DMSO) and formulated in 5% carboxymethylcellulose solution and given in a dose of 50 mg/kg. Dasatinib was dissolved in H<sub>2</sub>O and given in a dose of 5 mg/kg. Control mice were treated with equal volumes of vehicle (carboxymethylcellulose and H<sub>2</sub>O). Drugs or vehicle was given by oral gavage twice per day for 5 days followed by a 2-day rest in a volume of 0.01 mL/g of mouse body weight. The treatment continued until the death of the control mice.

**Morphological and immunophenotypic analysis.** Peripheral blood cell counts were performed with a Poch-100iv Diff (Sysmex Corp). Smears and cytopsin preparations were subject to Wright's staining for routine cell morphology. For immunophenotyping, after lysis of red blood cells, white blood cells were incubated for 30 minutes with antibodies against Gr-1, Mac-1, CD3, B220, CD117 or cocktail of lineage antibodies purchased from BD Pharmingen or eBioscience. The cells then were spun down, re-suspended in 200  $\mu$ L PBS, and analyzed on LSR Fortessa<sup>TM</sup> X-20 (BD Biosciences).

**Statistical analysis.** The differences in cell proliferation between different groups were statistically analyzed by using an unpaired Student's *t* test. Comparisons of categorical variables were determined by Pearson's Chi-square test or Fisher's exact test. The OS and EFS were estimated by Kaplan-Meier method and compared by log-rank test. OS was defined as from the diagnosis of the disease to death or alive at last follow-up (censored); EFS was from disease diagnosis to treatment failure such as relapse, death, or alive in CR at last follow-up (censored). The last follow-up was carried out on February 2017. *P* values <0.05 were considered statistically significant. All statistical procedures were performed with the GraphPad Prism 5, R3.2.2 or SPSS Version 22.0 statistical software.



## SI Figures

**Figure S1. Kaplan-Meier survival curves of adult ( $\geq 18$  years) and pediatric ( $< 18$  years) T-ALL patients.**

(a) OS of children and adults with T-ALL,  $P < 0.0001$ . The 3-year-OS of pediatric patients was 72.8% (95% CI 67.3-78.3), and the 3-year-OS rate of adult patients was 29.0% (95% CI 22.4-35.6). (b) RFS of children and adults with T-ALL,  $P < 0.0001$ . The 3-year-EFS of pediatric patients was 70.7% (95% CI 65.2-76.2), and the 3-year-EFS of adult patients was 18.6% (95% CI 12.9-24.3).

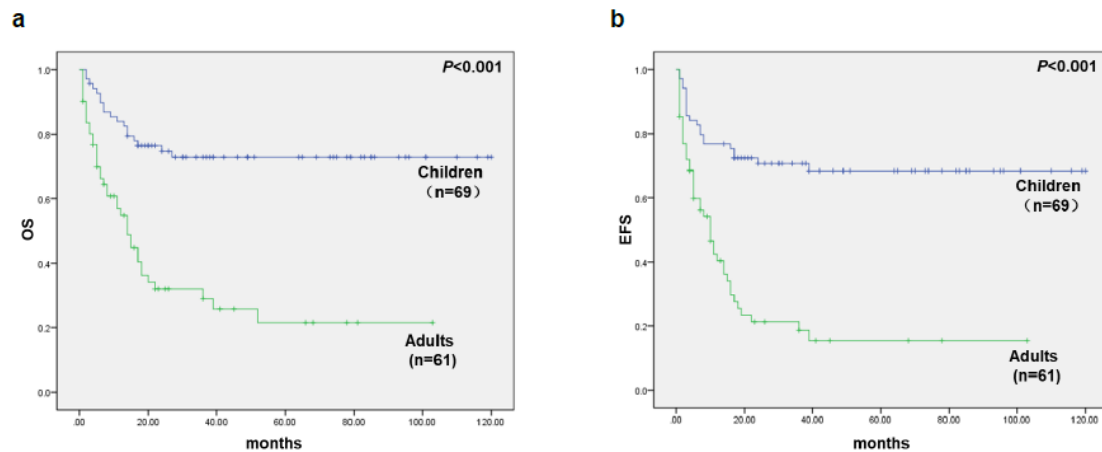

**Figure S2. Novel identified 18 rearrangements in 130 T-ALL patients.**

Predicted domain structure of four type fusion genes. Type1 included *SLC38A2-ABL2*, *GNPTAB-ATF7IP*, *ARL8A-INSRR*, *MELK-SIK3*, *MBNL1-TAL1*, *ZBTB16-ABL1*, *MYH9-JAK2*, *EEFSEC-PDHX*, *MBNL1-ANXA3*, *NUP98-VRK1*, and *IKZF1-NOTCH1*. Type2 included *CCND3-STIL*, *EVL-NKX2-1* and *EVL-SFTA3*. Type3 included *ZFP36L2-TRA*, *TRB-AHI1*, *TRA-SALL2* and *TRD-NKX2-1*. Type4 included *PPP4R3A-IGH*. The main domains of the protein structure information were extracted from the UniProt and NCBI conserved domain databases. *EVL-NKX2-1* and *EVL-SFTA3* were located in the same case C47. *EVL-SFTA3* probably caused by a splicing between *EVL* and *SFTA3*, which is located just downstream to *NKX2-1*. We counted *EVL-NKX2-1* and *EVL-SFTA3* as one novel fusion event.

## Type 1

Case ID: A5 Fusion: *SLC38A2-ABL2* Frame info: in-frame

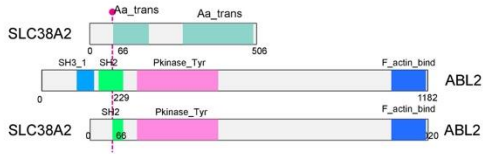

Case ID: A22 Fusion: *GNPTAB-ATF7IP* Frame info: in-frame

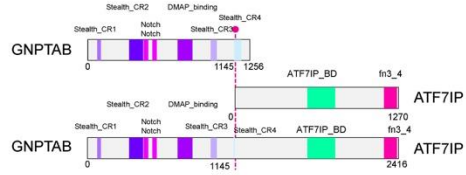

Case ID: A38 Fusion: *ARL8A-INSRR* Frame info: in-frame

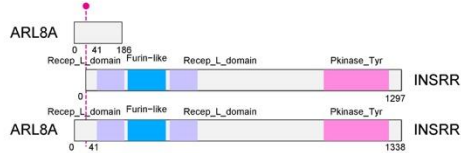

Case ID: C1 Fusion: *MELK-SIK3* Frame info: in-frame

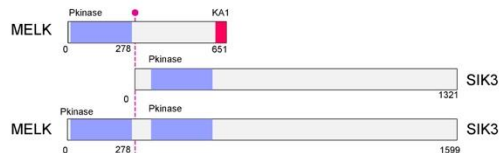

Case ID: C6 Fusion: *MBNL1-TAL1* Frame info: in-frame

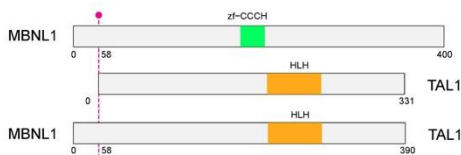

Case ID: C11 Fusion: *ZBTB16-ABL1* Frame info: in-frame

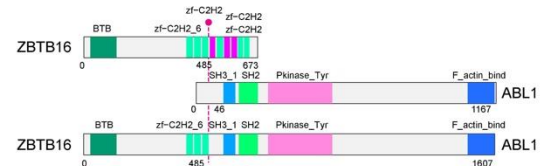

Case ID: C23 Fusion: *ZBTB16-ABL1* Frame info: in-frame

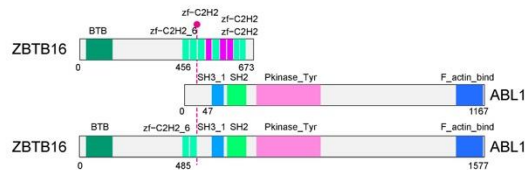

Case ID: C20 Fusion: *MYH9-JAK2* Frame info: in-frame

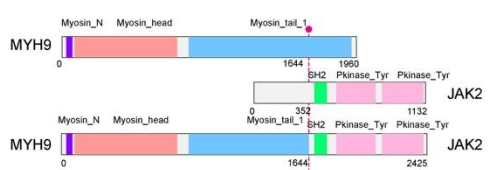

Case ID: C25 Fusion: *EEFSEC-PDHX* Frame info: in-frame

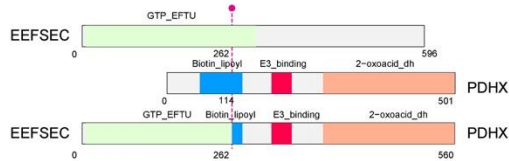

Case ID: C31 Fusion: *MBNL1-ANXA3* Frame info: in-frame

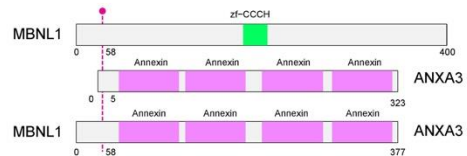

Case ID: C43 Fusion: *NUP98-VRK1* Frame info: in-frame

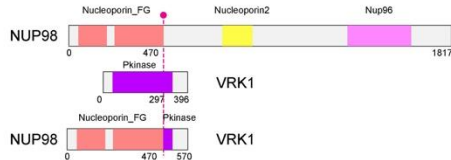

Case ID: C63 Fusion: *IKZF1-NOTCH1* Frame info: in-frame

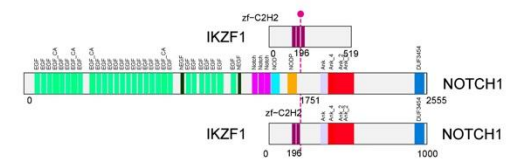

## Type 2

Case ID: A36 Fusion: *CCND3-STIL* Frame info: in-frame

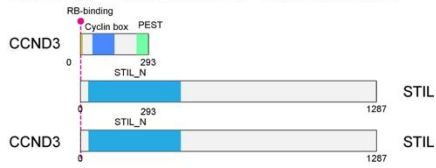

Case ID: C47 Fusion: *EVL-NKX2-1* Frame info: in-frame

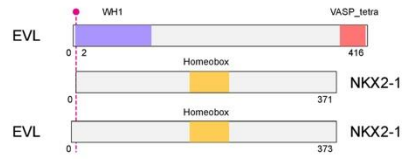

Case ID: C47 Fusion: *EVL-SFTA3* Frame info: in-frame

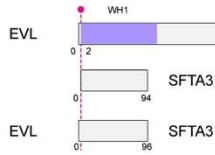

## Type 3

Case ID: A25 Fusion: *ZFP36L2-TRA* Frame info: UTR/---

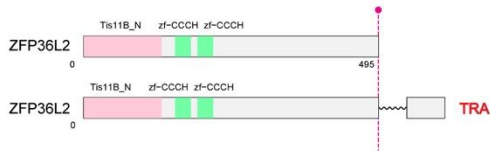

Case ID: C17 Fusion: *TRB-AHI1* Frame info: ---/CDS

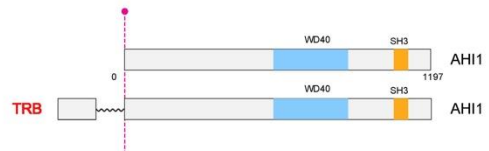

Case ID: C22 Fusion: *TRA-SALL2* Frame info: ---/CDS

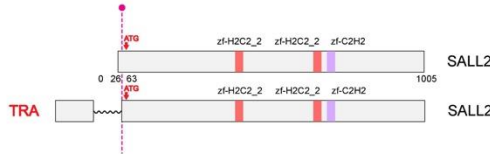

Case ID: C38 Fusion: *TRA-SALL2* Frame info: ---/CDS

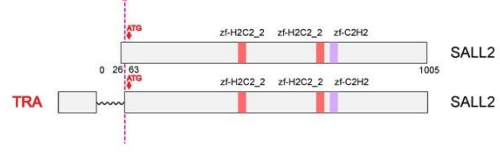

Case ID: C55 Fusion: *TRD-NKX2-1* Frame info: ---/UTR

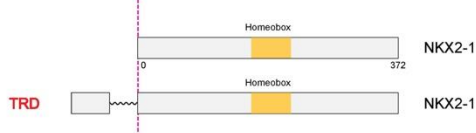

## Type 4

Case ID: C60 Fusion: *PPP4R3A-IGH* Frame info: intronic/---

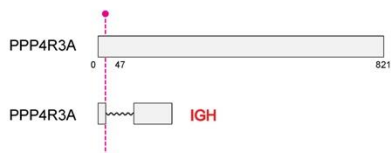

**Figure S3. *EVL*, *NKX2-1* and *SALL2* gene expression levels in 130 T-ALL patients.**

T-ALL cases in G1, G2 and G3 groups were shown in different colors. **(a)** *EVL* was highly expressed in 130 T-ALL patients. **(b)** *NKX2-1* was highly expressed in cases with *TRD-NKX2-1* and *EVL-NKX2-1* fusions. **(c)** Cases with *TRA-SALL2* fusions had higher expression of *SALL2* than others.

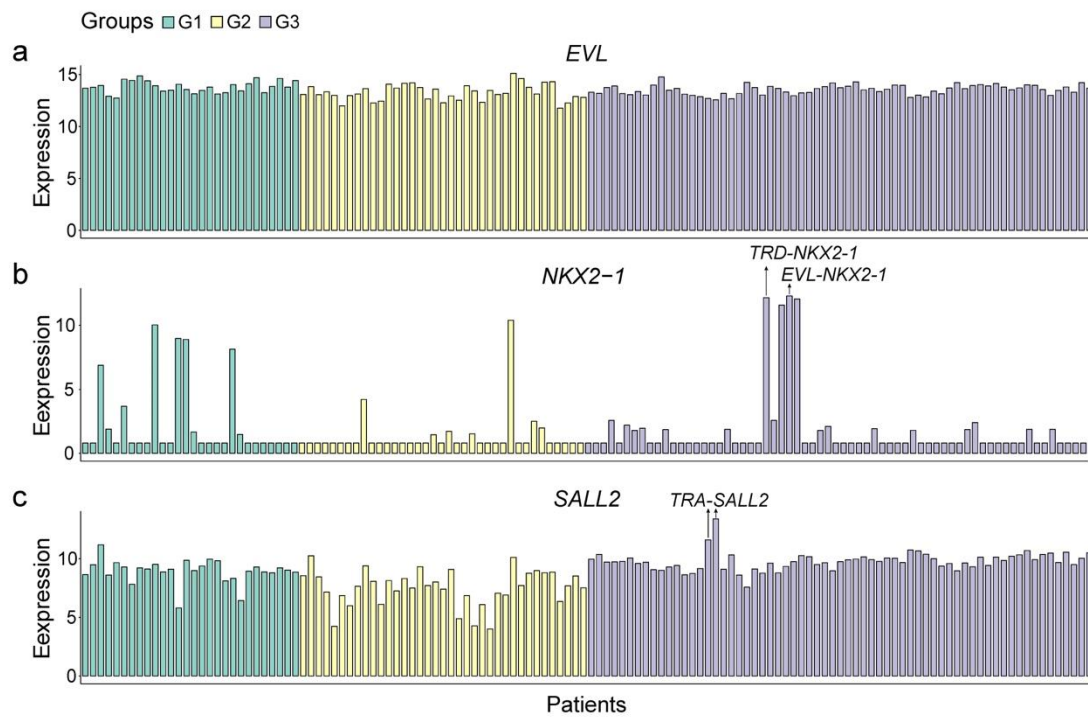

**Figure S4. Phenotypic and morphological analysis of ZBTB16-ABL1 (ZA) mice.**

(a) Average percent of GFP<sup>+</sup> cells in PB after BMT. (b) Histogram of WBC counts in control and ZA mice. (c) Histogram of the relative proportions of cells with different populations of BM cells of ZBTB16-ABL1 (ZA) mice and control mice as determined by morphological analysis. (d) Spleen weight/body weight of control and ZA mice. Scale bar, 1 cm. (e) Liver weight/body weight of control and ZA mice. Scale bar, 1 cm. (f) Wright staining of BM cytopsin samples from ZBTB16-ABL1 (ZA) mice and control. Scale bar, 15  $\mu$ m. (g) Morphological comparison of PB in control and ZA mice. Scale bar, 10  $\mu$ m. (h) Wright staining of cytopsin of spleen from control and ZA mice. Scale bar, 10  $\mu$ m. (i) Representative flow cytometric analysis of GFP-expressing BM cells for Gr-1 and Mac-1 in ZBTB16-ABL1 (ZA) versus control. Error bars represent mean  $\pm$  s.d. ( $n=4-10$  recipients per group). \*\*\* $P<0.001$ . Statistical significance was determined using two-sided Student's  $t$  test.

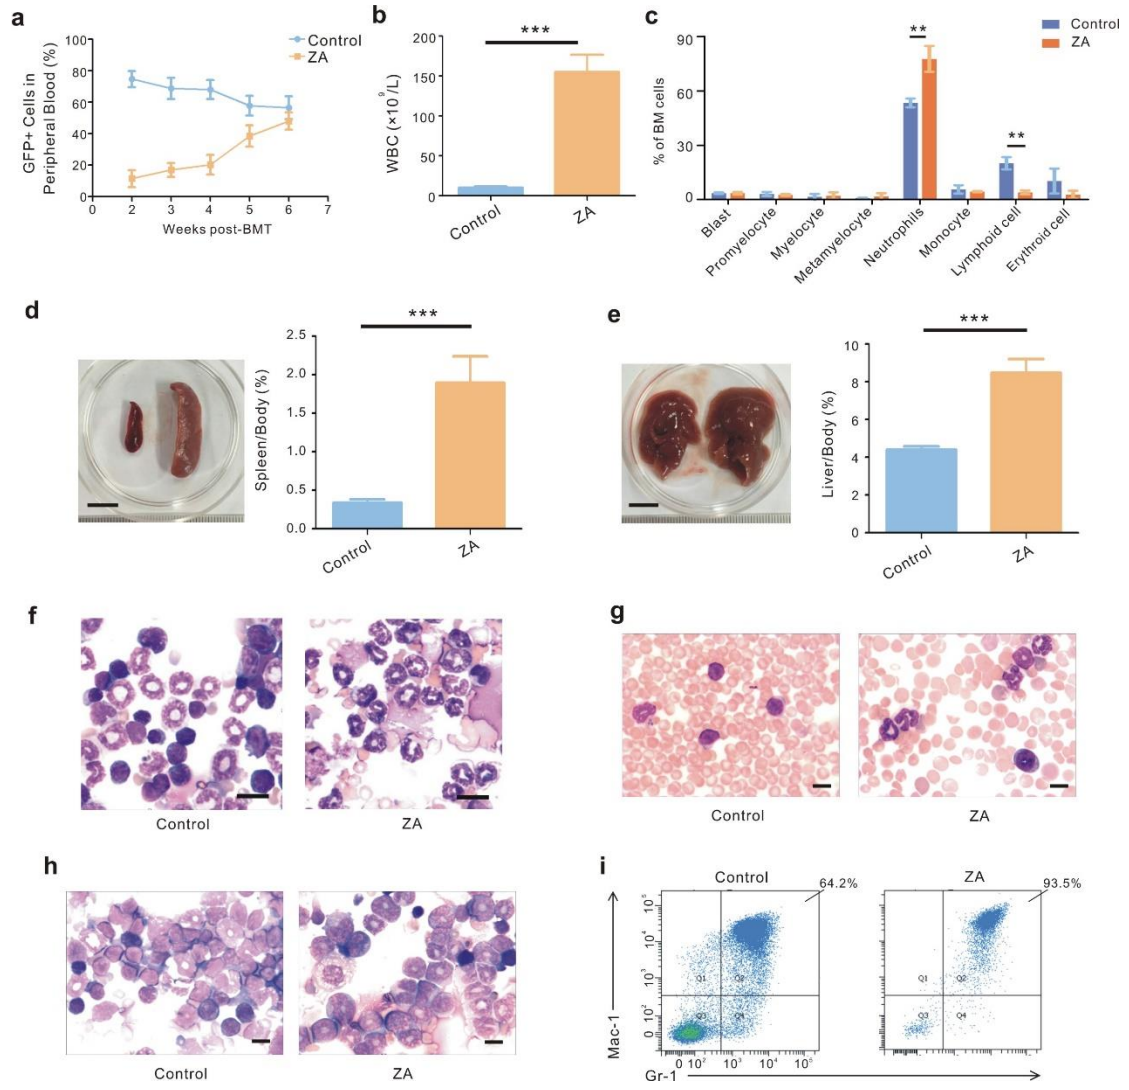

**Figure S5. Unsupervised hierarchical clustering of global gene expression profile from 130 T-ALL patients.** Columns indicate individual T-ALL patients, and rows represent 1,484 most variably expressed genes on autosomal chromosome according to RNA-seq data. Gene over-expression and under-expression status are shown in red and green, respectively. Three major T-ALL groups are identified on the basis of gene expression profiles. Group 3 can be further divided into G3a and G3b subgroups.

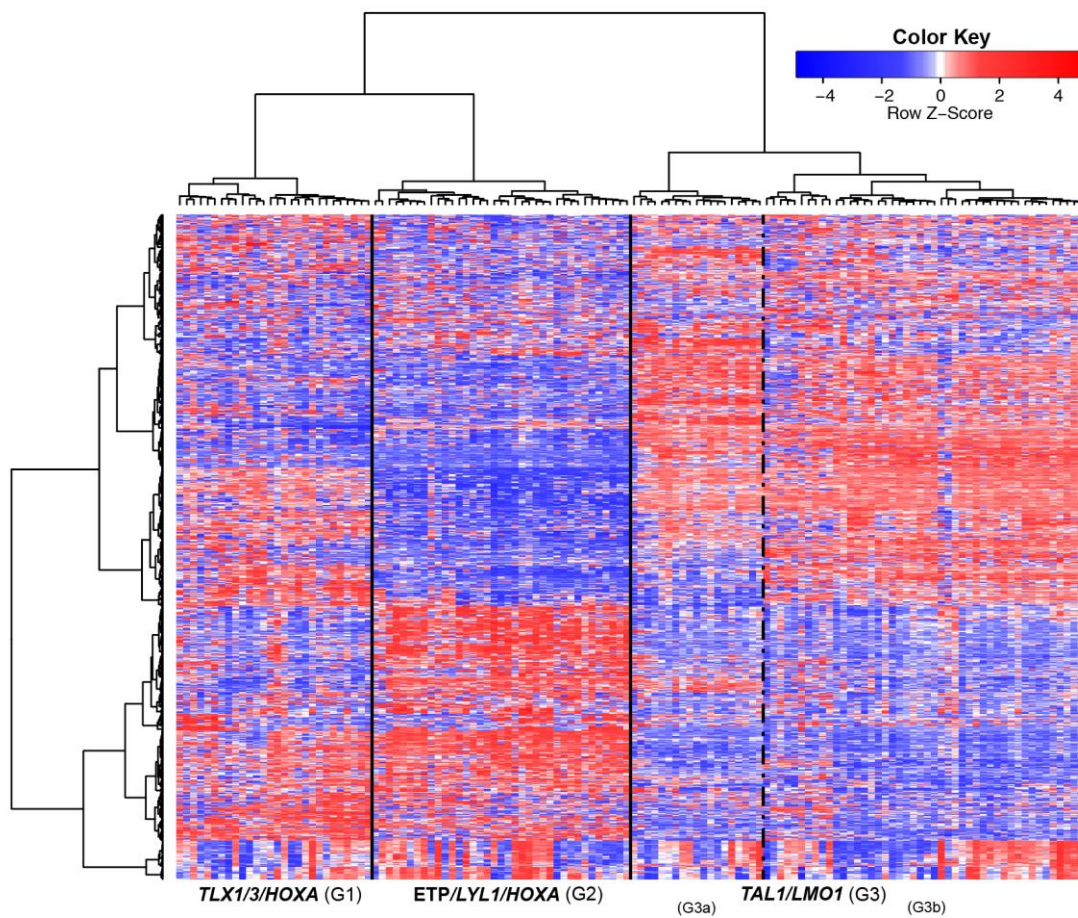



**Figure S6. Gene functional analysis of expression profile for each group.**

Gene ontology (GO) analysis of the up-regulated genes in each transcriptome-based group (G1, G2 and G3) was performed with Database for Annotation Visualization and Integrated Discovery (DAVID) v6.8. KEGG pathways enrichment  $\log_{10}$  transferred P-Values were shown as bar plot. G1, G2 and G3 functional enrichment results were listed below as (a), (b) and (c), respectively.

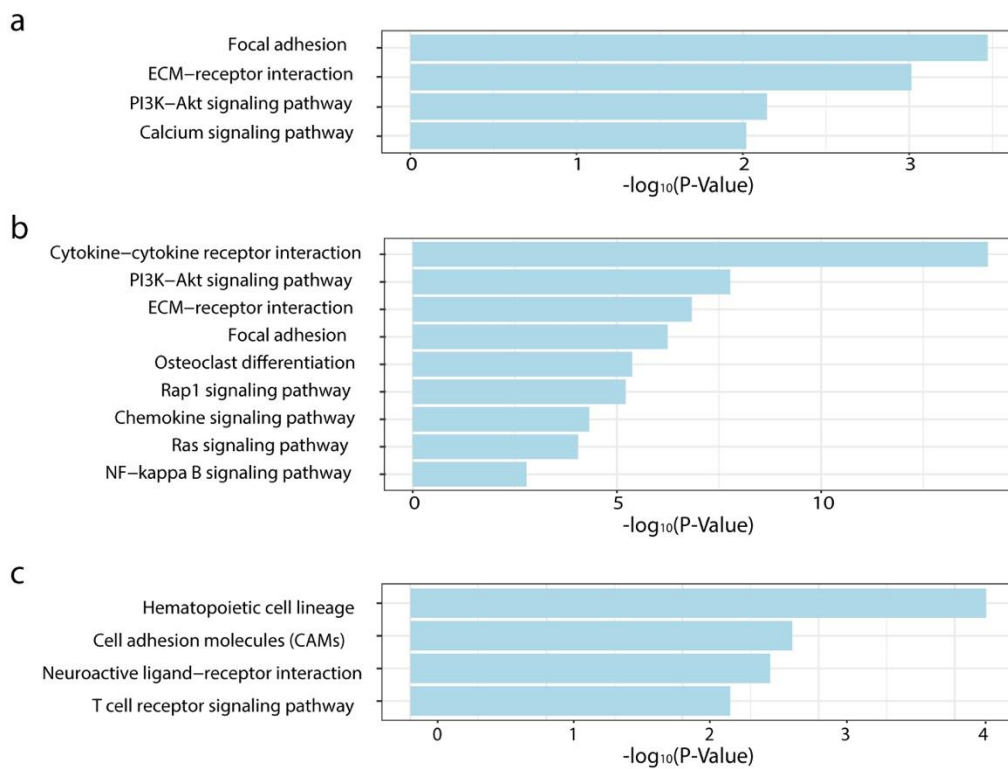

**Figure S7. Aberrant *SLC17A9* short transcript in T-ALL patients.** (a) Coverage tracks in RNA-seq data for a *SLC17A9* wild-type case (top) and a short isoform case with deletion of exon 1-8 (bottom). (b) Detail of *SLC17A9* exon 9 coverage peak in the short isoform case. Amino acid information is annotated under the coverage track. (c) Predicted domain structure of *SLC17A9* protein. Location of a putative initiation codon (methionine) in exon 9 is pointed by a green pointer.

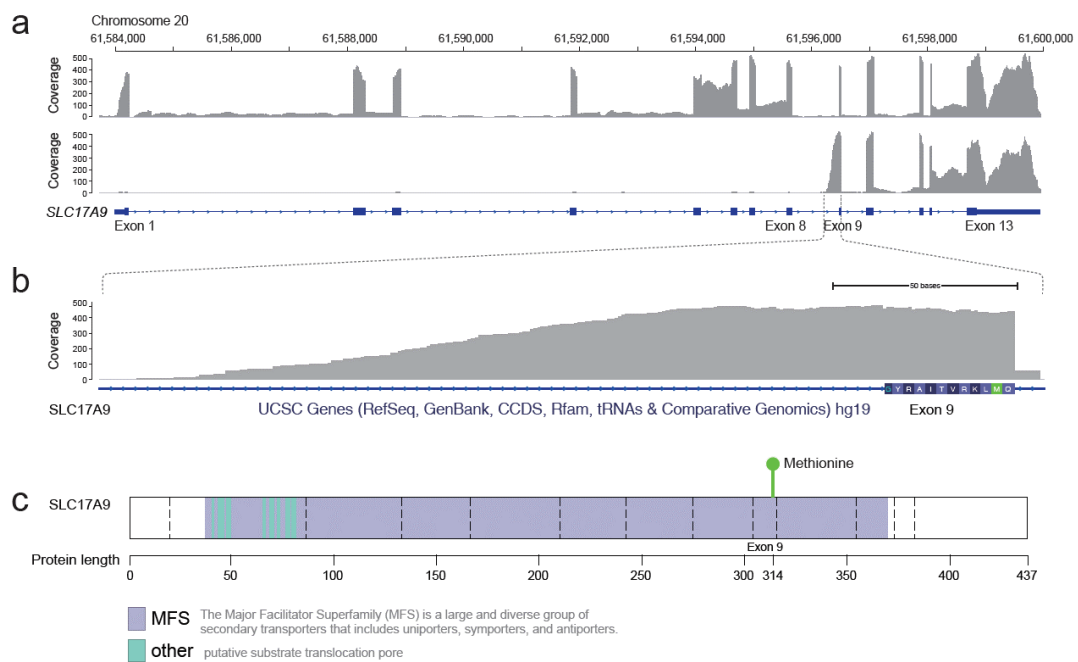

**Figure S8. Schematic location of the novel gene mutations with RNA-seq and WES.**

(a) CELSR3, (b) PAK4, (c) MINK1, (d) NR4A1, (e) BOD1L1, (f) VCP gene mutation sites were positioned in terms of protein structure with the main domain information according to NCBI conserved domain database. PolyPhen and SIFT were applied to the prediction of amino acid substitution to deteriorate proteins' function. For the totally 25 mutations, the prediction results of PolyPhen showed that 13 of them were "Probably damaging", 6 of them were "Possibly damaging", 4 of them were "Benign"; SIFT predicted that 12 mutations were "Damaging", 10 mutations were "Tolerated" and 3 mutations were unavailable. Especially, for the big gene *CELSR3*, all amino acid substitutions on this gene deteriorate protein' s function. The prediction results for *CELSR3* were "Possibly damaging", "Damaging", or "Tolerated" in both of PolyPhen and SIFT.

● MISSENSE    ● PROTEININS    ● SPLICE  
 PolyPhen: PRD-Probably damaging    POD-Possibly damaging    B-Benign    N-Not available  
 SIFT: D-Damaging    T-Tolerated    N-Not available

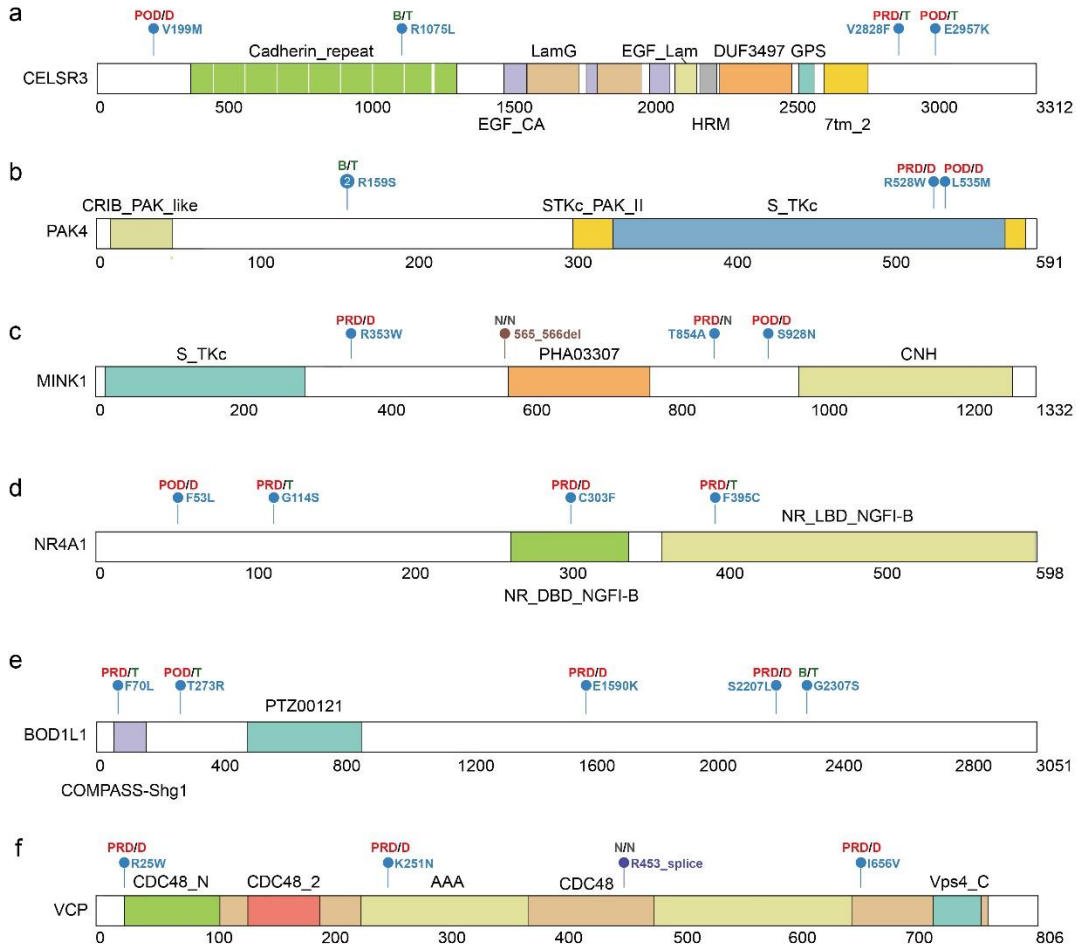

**Figure S9. The correlation between mutation counts and age.**

**(a)** Violin plot of mutation counts in adult and children ( $P=0.001$ ). Gene mutation rates over 3% were taken into account in the comparison. **(b)** Correlation between mutation counts and age of 130 T-ALL patients subject to RNA-seq and WES that all founded mutations were included.

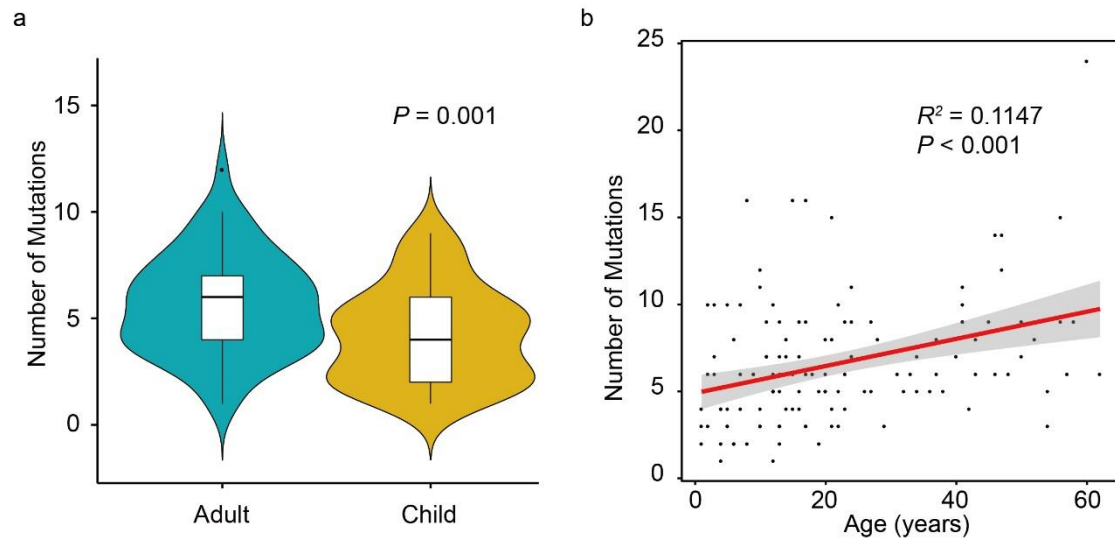

**Figure S10. *MEF2C* gene expression levels in 130 T-ALL patients**

T-ALL cases in G1, G2 and G3 groups were shown in different colors. The cut-off value of *MEF2C* over-expression was defined as greater than one standard deviation above mean expression (FPKM: 10.5). The corresponding horizontal red line indicated the threshold.

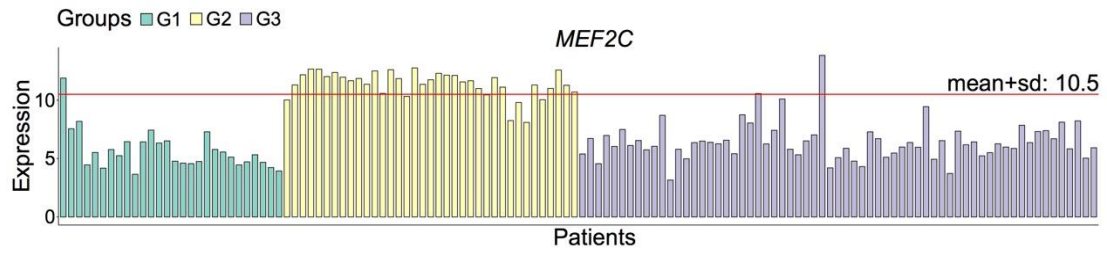

**Figure S11. Kaplan-Meier survival curves of pediatric (<18 years) T-ALL patients with COG risk classification.**

(a) OS of children with COG risk classification,  $P < 0.0001$ . The 3-year-OS of patients with standard-, intermediate- and high-risk was 87.4% (95% CI 81.4-93.4), 64.3% (95% CI 49.7-78.9) and 12.5% (95% CI 0.8-24.2), respectively.

(b) RFS of with COG risk classification,  $P < 0.0001$ . The 3-year-EFS of patients with standard-, intermediate- and high-risk was 83.3% (95% CI 76.2-90.4), 51.3% (95% CI 36.7-65.9) and 12.5% (95% CI 0.8-24.2), respectively.

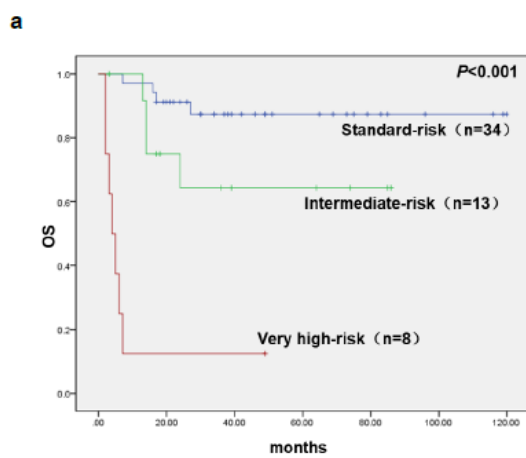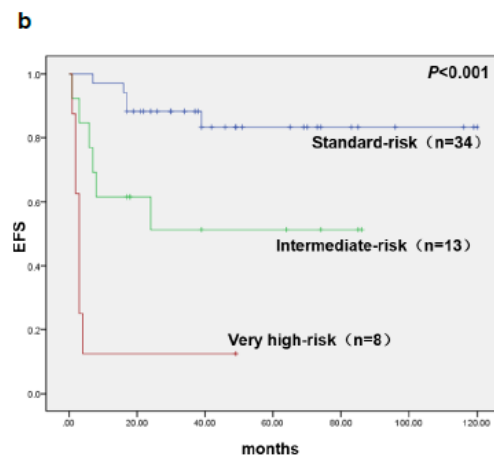

## SI Tables

**Table S1. Genetic characteristics of 130 patients with T-ALL**

| Characteristics                     | Group 1 (n=28) | Group 2 (n=37) | Group 3 (n=65) | P value |
|-------------------------------------|----------------|----------------|----------------|---------|
| <b>Immunophenotype <sup>a</sup></b> |                |                |                |         |
| ETP                                 | 2              | 22             | 0              | <0.001  |
| Pro                                 | 1              | 5              | 3              | 0.172   |
| Pre                                 | 3              | 8              | 23             | 0.035   |
| Cortical                            | 15             | 1              | 30             | <0.001  |
| Medullary                           | 7              | 1              | 9              | 0.030   |
| <b>Fusion genes</b>                 |                |                |                |         |
| <i>STIL-TAL1</i>                    | 0              | 0              | 20 (30.8%)     | <0.001  |
| TCR-related                         | 0              | 1 (2.7%)       | 9 (13.8%)      | 0.029   |
| <i>LMO1/2-TRA</i>                   | 0              | 0              | 4              | 0.127   |
| other TCR-related                   | 0              | 1              | 5              | 0.217   |
| NUP-related                         | 3 (10.7%)      | 15 (40.5%)     | 1 (1.5%)       | <0.001  |
| <i>SET-NUP214</i>                   | 0              | 10 (27%)       | 0              | <0.001  |
| <i>NUP214-ABL1</i>                  | 3              | 1              | 1              | 0.098   |
| <i>NUP98</i> -related               | 0              | 4 (10.8%)      | 0              | 0.006   |
| <i>KMT2A</i> -related <sup>b</sup>  | 2              | 0              | 2              | 0.256   |
| <i>PICALM-MLLT10</i>                | 3 (10.7%)      | 1 (2.7%)       | 0              | 0.023   |
| <i>ZBTB16-ABL1</i>                  | 0              | 0              | 2              | 0.362   |
| Other fusion genes                  | 5              | 3              | 9              | 0.496   |
| <b>Gene over-expression</b>         |                |                |                |         |
| <i>TAL1</i>                         | 2 (7.1%)       | 4 (10.8%)      | 24 (36.9%)     | 0.001   |
| <i>LMO1</i>                         | 0              | 2 (5.4%)       | 10 (15.4%)     | 0.040   |
| <i>LMO2</i>                         | 0              | 6 (16.2%)      | 8 (12.3%)      | 0.096   |
| <i>LYL1</i>                         | 4 (14.3%)      | 21 (56.8%)     | 4 (6.2%)       | <0.001  |
| <i>HOX</i> -related                 | 28 (100%)      | 29 (78.4%)     | 4 (6.2%)       | <0.001  |
| <i>TLX1</i>                         | 3 (10.7%)      | 0              | 0              | 0.004   |
| <i>TLX3</i>                         | 18 (64.3%)     | 0              | 0              | <0.001  |
| <i>HOXA</i>                         | 17 (60.7%)     | 29 (78.4%)     | 4 (4.2%)       | <0.001  |
| <i>MEF2C</i>                        | 1 (3.6%)       | 30 (81.1%)     | 2 (35.4%)      | <0.001  |
| <b>Gene mutations</b>               |                |                |                |         |
| <i>NOTCH1 / FBXW7</i> (C1)          | 26 (92.9%)     | 29 (78.4%)     | 47 (72.3%)     | 0.087   |
| Signaling Pathways (C2)             | 17 (60.7%)     | 31 (83.8%)     | 29 (44.6%)     | <0.001  |
| JAK-STAT pathway                    | 11 (39.3%)     | 19 (51.4%)     | 3 (4.6%)       | <0.001  |
| RAS pathway                         | 4 (14.3%)      | 17 (45.9%)     | 4 (6.2%)       | <0.001  |
| PI3K pathway                        | 2 (7.1%)       | 0              | 14 (21.5%)     | 0.004   |
| <i>PTEN</i>                         | 0              | 1 (2.7%)       | 12 (18.5%)     | 0.005   |
| Epigenetic Factors (C3)             | 24 (85.7%)     | 33 (89.2%)     | 21 (32.3%)     | <0.001  |
| <i>PHF6</i>                         | 17 (60.7%)     | 13 (35.1%)     | 1 (1.5%)       | <0.001  |
| Transcription Factors (C4)          | 7              | 14             | 17             | 0.394   |



<sup>a</sup> The immunophenotypes are classified according to the recommendation of European Group for the Immunological Characterization of Leukemias (EGIL)(28) and the National Comprehensive Cancer Network (NCCN) guideline(29). <sup>b</sup> *KMT2A*-related fusions include *KMT2A-MLLT1* (1 case), *KMT2A-MLLT4* (1), *KMT2A-ELL* (1), and *KMT2A-CBL* (1), respectively.

**Table S2. Clinical and genetic characteristics of 130 patients with T-ALL according to Immunophenotype**

| Characteristics                    | ETP        | Pro       | Pre         | Cortical   | Medullary | P value |
|------------------------------------|------------|-----------|-------------|------------|-----------|---------|
| <b>Gender, male/female</b>         | 14 / 10    | 5 / 4     | 26 / 8      | 37 / 9     | 13 / 4    | 0.229   |
| <b>Age, years, Median (range)</b>  | 39 (7-62)  | 23 (1-50) | 13.5 (2-60) | 15 (1-50)  | 16 (4-37) |         |
| <b>WBC count</b>                   |            |           |             |            |           | 0.007   |
| >=100×10 <sup>9</sup> /L           | 2 (8.3%)   | 2 (22.2%) | 18 (52.9%)  | 19 (41.3%) | 8 (47.1%) |         |
| <100×10 <sup>9</sup> /L            | 22 (91.7%) | 7 (77.8%) | 16 (47.1%)  | 27 (58.7%) | 9 (52.9%) |         |
| <b>Complete Remission</b>          | 17 (70.8%) | 7 (77.8%) | 27 (79.4%)  | 42 (91.3%) | 17 (100%) | 0.056   |
| <b>Relapse<sup>a</sup></b>         | 2 (11.8%)  | 2 (28.6%) | 7 (25.9%)   | 9 (21.4%)  | 8 (47.1%) | 0.181   |
| <b>Fusion genes</b>                |            |           |             |            |           |         |
| <i>STIL-TAL1</i>                   | 0          | 0         | 10 (29.4%)  | 8 (17.4%)  | 2 (11.8%) | 0.022   |
| TCR-related                        | 1          | 0         | 2           | 7          | 0         | 0.170   |
| <i>LMO1/2-TRA</i>                  | 0          | 0         | 0           | 4          | 0         | 0.110   |
| other TCR-related                  | 1          | 0         | 2           | 3          | 0         | 0.777   |
| NUP-related                        | 10 (41.7%) | 3 (33.3%) | 2 (5.9%)    | 3 (6.5%)   | 1 (5.9%)  | <0.001  |
| <i>SET-NUP214</i>                  | 8 (33.3%)  | 1 (11.1%) | 0           | 1          | 0         | <0.001  |
| <i>NUP214-ABL1</i>                 | 0          | 0         | 2           | 2          | 1         | 0.750   |
| <i>NUP98</i> -related              | 2 (8.3%)   | 2 (22.2%) | 0           | 0          | 0         | 0.003   |
| <i>KMT2A</i> -related <sup>b</sup> | 1          | 0         | 1           | 1          | 1         | 0.916   |
| <i>PICALM-MLLT10</i>               | 1          | 0         | 0           | 2          | 1         | 0.707   |
| <i>ZBTB16-ABL1</i>                 | 0          | 1         | 1           | 0          | 0         | 0.123   |
| Other fusion genes                 | 1          | 2         | 4           | 7          | 3         | 0.577   |
| <b>Gene over-expression</b>        |            |           |             |            |           |         |
| <i>HOX</i> -related                | 20 (83.3%) | 7 (77.8%) | 8 (23.5%)   | 17 (37.0%) | 9 (52.9%) | <0.001  |
| <i>TLX1</i>                        | 0          | 0         | 1           | 1          | 1         | 0.771   |
| <i>TLX3</i>                        | 1          | 1         | 2           | 10         | 4         | 0.112   |
| <i>HOXA</i>                        | 19 (79.2%) | 6 (66.7%) | 6 (17.6%)   | 10 (21.7%) | 9 (52.9%) | 0.000   |
| <i>LMO1</i>                        | 2          | 0         | 2           | 5          | 3         | 0.562   |
| <i>LMO2</i>                        | 5          | 0         | 4           | 4          | 1         | 0.370   |
| <i>LYL1</i>                        | 14 (58.3%) | 3 (33.3%) | 3 (8.8%)    | 6 (13.0%)  | 3 (17.6%) | <0.001  |
| <i>TAL1</i>                        | 4          | 0         | 10          | 13         | 3         | 0.287   |

|                                   |            |           |            |            |            |        |
|-----------------------------------|------------|-----------|------------|------------|------------|--------|
| <i>SLC17A9</i> -short             | 0          | 0         | 21 (61.8%) | 28 (60.9%) | 9 (52.9%)  | <0.001 |
| <i>MEF2C</i>                      | 20 (83.3%) | 4 (44.4%) | 7 (20.6%)  | 2 (4.3%)   | 0          | <0.001 |
| <b>Gene mutations</b>             |            |           |            |            |            |        |
| <i>NOTCH1</i> / <i>FBXW7</i> (C1) | 19         | 8         | 23         | 40         | 12         | 0.237  |
| Signaling Pathways (C2)           | 17         | 6         | 18         | 24         | 12         | 0.284  |
| JAK-STAT pathway                  | 8          | 3         | 8          | 9          | 5          | 0.712  |
| RAS pathway                       | 11 (45.8%) | 2 (19.2%) | 5 (14.7%)  | 6 (13.0%)  | 1 (5.9%)   | 0.006  |
| PI3K pathway                      | 0          | 0         | 4 (11.8%)  | 6 (13.0%)  | 6 (35.3%)  | 0.011  |
| <i>PTEN</i>                       | 1          | 1         | 5          | 3          | 3          | 0.481  |
| Epigenetic Factors (C3)           | 20 (83.3%) | 6 (66.7%) | 19 (55.9%) | 21 (45.7%) | 12 (70.6%) | 0.032  |
| <i>PHF6</i>                       | 8          | 2         | 6          | 10         | 5          | 0.676  |
| Transcription Factors (C4)        | 10         | 2         | 9          | 14         | 3          | 0.514  |

<sup>a</sup> The relapse rate is calculated based on the number of the cases with complete remission.

<sup>b</sup> *KMT2A*-related fusions include *KMT2A-MLLT1* (1 case), *KMT2A-MLLT4* (1), *KMT2A-ELL* (1), and *KMT2A-CBL* (1), respectively.

**Table S3. Specific gene signatures of Pro, Pre, Cortical, Medullary and ETP immunophenotypic subgroups based on gene expression signal**

| Pro      |                | Pre      | Cortical  | Medullary | ETP       |          |          |          |
|----------|----------------|----------|-----------|-----------|-----------|----------|----------|----------|
| CD8B     | CDRT1          | PARD3B   | TSPYL2    | TMEM213   | BLNK      | PPM1J    | CDH13    | PRICKLE2 |
| CD4      | PTPRM          | CDH9     | GADD45G   | CLEC9A    | PRX       | ACOT11   | SCARA5   | HTRA3    |
| POU3F2   | SCN4B          | ADAMTS8  | BNIP1     | PROZ      | FAM160A1  | CYP1B1   | CD163    | C1QTNF4  |
| CD8A     | SPR            | TENM3    | RGMB      | ATP6V0A4  | KLHL4     | C1QA     | EGFL7    | CYTL1    |
| ATP6AP1L | ITIH6          | TMEM121  | TP53INP2  | ADAM23    | TF        | GPX8     | CTGF     | NOVA2    |
| CD1A     | EDARADD        | LAMC3    | NNAT      | RSAD2     | TIFAB     | CCDC50   | LAMA4    | EPHA2    |
| RAG1     | CHRNA3         | CAPN12   | SPATA21   | LIPG      | PTK2      | FAM46A   | LPCAT2   | IGLL1    |
| LYST     | CPNE8          | TRPV5    | GADD45A   | OAS1      | IRF8      | PRODH    | NLRP7    | DUSP27   |
| CD1D     | KLK1           | PLA2G4F  | GPR3      | RNF157    | CP        | LDLRAD3  | ARHGEF17 | HLA-DQB1 |
| CEP128   | TCEAL2         | MOBP     | COL6A2    | RNF168    | TNFRSF11A | FCER1A   | FNDC1    | CLEC4M   |
| TRHDE    | ASAH2          | SYN3     | B3GNT4    | MX1       | OLFML2B   | BTK      | EGFR     | CX3CL1   |
| MAP6D1   | HOMER1         | CPNE9    | CACNG4    | FFAR2     | LDLRAD2   | GUCY2D   | IL33     | SLC22A3  |
| AMER2    | ULBP1          | OSBPL10  | TRAF4     | G0S2      | MCTP2     | P2RY2    | SCHIP1   | KLHL13   |
| GJB6     | DPYSL5         | HTRA4    | MATN1     | ACE       | SMOC1     | LTK      | BCAN     | ANO2     |
| FGFR3    | GPC3           | CYP26C1  | FSCN3     | CTSH      | ZDHHC14   | NOG      | KIT      | CADPS2   |
| SIRPG    | WNK2           | THPO     | TMEM88    | HSPA6     | VCAM1     | GLYATL2  | MLC1     | CACNA2D3 |
| ADAMTS17 | ARHGAP19-SLIT1 | COMP     | GATA6     | RGMA      | APOE      | FMO2     | FLT3     | ADRA2A   |
| PITPNM2  | PDE10A         | CATSPERD | PPP1R15A  | PGLYRP2   | SLCO2B1   | LYN      | GNG7     | APOB     |
| KCNK9    | SNAP25         | SLC45A1  | CYP4X1    | LAMA2     | CLEC4C    | MYLK     | PLA1A    | TBX2     |
| SLC29A1  | ANKRD1         | COL5A2   | CYP4F11   | PTGIS     | CXCL11    | FOXC1    | GNG12    | ASCL4    |
| HIST2H3A | CNNM1          | MYBPC3   | MAFB      | CLEC4D    | SUCNR1    | TNFSF13B | MN1      | PTGFR    |
| MNS1     | SUSD4          | GLP2R    | IBA57-AS1 | LIF       | ANKRD65   | FZD4     | NAV3     | CSRP3    |
| DMPK     | PPP1R3C        | PPFIBP2  | DPPA4     | ROR1      | NRP1      | BMP2     | CD33     | GP9      |
| FSTL4    | FBXO27         | BEGAIN   | AXDND1    | SYT11     | ADRB2     | BAALC    | SH3BP4   | TBL1Y    |
| DAAM2    | AKAP12         | INSRR    | POU5F1B   | ROBO2     | CSF1      | COL8A1   | TNR      | NYNRIN   |
| GJB2     | NINL           | MSR1     | IER3      | CLEC4E    | NEK6      | ICAM5    | LPL      | ACSM5    |
| GCSAM    | ELOVL4         | FGF18    | LRRC10B   | PLIN2     | C1QC      | IL13RA1  | KIAA0087 | OPHN1    |
| MEST     | ASAH2B         | NFASC    | TTC39A    | RPRML     | AK4       | CD209    | SGCD     | HTR1F    |
| CD1C     | B3GAT1         | SPAG17   | TLE2      | CHAT      | ITGA9     | ABCA3    | LUM      | EFS      |
| ACOXL    | LGALS2         | CELSR1   | PDGFRB    | RGS17     | LBP       | MOB3B    | CSRP2    | LGR5     |
| PLAG1    | OLFM1          | GNAT2    | IRGC      | FGF14     | CCDC80    | PROSER2  | NR2F1    | WNT6     |
| FYB      | DTX1           | CYP27B1  | KLHL35    | SLC7A11   | SAMD11    | PLTP     | CCL1     | EDIL3    |
| DIO2     | TREH           | PCDHGA3  | FOXA1     | B3GALT1   | KANK2     | NOXA1    | PARVA    | COL21A1  |
| SLAMF1   | DRAXIN         | SIGLEC11 | CACNA1I   | ISG15     | PXDC1     | IRGM     | SERPINB6 | SLC6A1   |
| AQP6     | STEAP1B        | ALPK3    | PDE4C     | SEMA4A    | CHL1      | CHRD     | DHRS9    | CYP27C1  |
| SMPD3    | GAD2           |          | SERTAD1   | F7        | FCRLA     | PLXNB2   | CAPNS2   | DUSP15   |
| AQP3     | ANTXR1         |          | VWA5A     | HPGD      | SVEP1     | SPIC     | TM4SF18  | PRSS57   |
| GSC      | OR10K1         |          | PLEKHG3   | CLSTN2    | LRRK1     | BMP5     | MEF2C    | PPBP     |
| SH3GL3   | PTPN3          |          | JAKMIP3   | ARHGAP6   | HLA-DMA   | MS4A6A   | NCKAP5   | CEBPA    |
| RAG2     | UNC45B         |          | COL9A3    | LDOC1     | HLA-DPB1  | RAB3C    | VTCN1    | PSD3     |
| PCSK5    | SLIT1          |          | MTUS2     | STXBP5L   | TEK       | TENM4    | CFI      | FAM69C   |
| NLRP14   | CHRN3          |          | PDE2A     | L1CAM     | SHD       | FMO3     | RSPO1    | PRKG1    |
| KIRREL   | GUCY1A2        |          | OTUB2     | ANXA3     | PTGER2    | ADAMTS5  | WNT5A    | HLA-DRB5 |
| NPAS2    | RAET1L         |          | ADAMTS7   |           | CXCL12    | EPHB3    | DLX1     | ELN      |
| PRG4     | IGSF1          |          | BAG3      |           | DEXI      | NRGN     | GPT2     | FABP4    |
| FAM163B  | TMPRSS2        |          | TUBB2A    |           | FUT7      | MXRA5    | SEZ6L    | GABRE    |
| TPPP3    | PRKCZ          |          | USP2      |           | VSIG2     | CLEC4G   | ADAMTS9  | ACSS3    |
| PTCRA    | OR10T2         |          |           |           | NGFR      | FAM43A   | IL10     | ITGBL1   |
| FAM182B  | HMGCS2         |          |           |           | C1QB      | HSH2D    | STAP1    | CAMK2N2  |

| Pro       |           | Pre | Cortical | Medullary | ETP       |           |          |          |
|-----------|-----------|-----|----------|-----------|-----------|-----------|----------|----------|
| SHISA9    | PAX9      |     |          |           | CD5L      | SLC45A3   | CCL13    | IBSP     |
| METRNL    | MYO3A     |     |          |           | TNC       | ADCY9     | LINGO2   | CNTN1    |
| CX3CR1    | TEAD4     |     |          |           | SPARC     | ARHGGEF15 | LAMB4    | SHOX2    |
| KCNJ4     | SERTAD4   |     |          |           | MAPK12    | CDH5      | S100A16  | SEC14L5  |
| CCDC78    | NCKAP1    |     |          |           | IRF5      | GFRA2     | HRH4     | LAMP5    |
| GRB7      | MAT1A     |     |          |           | APP       | TBXA2R    | TM4SF1   | EGFL6    |
| FASLG     | ARMC4     |     |          |           | HLA-DMB   | MEIS3     | PDE4B    | PROM1    |
| FAM3B     | GPR63     |     |          |           | ACOX2     | LIFR      | ARHGAP22 | DCLK1    |
| FGR       | GLB1L2    |     |          |           | ARHGGEF40 | PLXNA4    | DLX2     | TBX3     |
| DCLK3     | CLEC10A   |     |          |           | LYVE1     | COL6A1    | LAPTM4B  | SOX9     |
| CD1E      | ESRP1     |     |          |           | DNASE1L3  | SPATA12   | NPAS3    | MRO      |
| BTN1A1    | DDAH1     |     |          |           | MET       | STAB1     | CPA3     | EYA1     |
| HIST3H2BB | CCDC8     |     |          |           | ITIH5     | CD300LF   | SALL4    | EGFLAM   |
| CPA5      | HPCAL4    |     |          |           | C7        | TCTEX1D1  | EMCN     | SLC6A11  |
| SCRN1     | SYT1      |     |          |           | FAM180B   | HTR7      | OPRK1    | ZNF536   |
| POF1B     | TRPC3     |     |          |           | FKBP10    | SRPX      | NTRK2    | PIRT     |
| HS6ST2    | MAL       |     |          |           | LHFPL2    | MPO       | TIE1     | PTH2     |
| GRM8      | ACSM4     |     |          |           | P2RY6     | STYK1     | HOXC4    | MS4A4E   |
| MST1R     | SPTSSB    |     |          |           | ABCC9     | FRK       | RAMP3    | LHX6     |
| HIST1H1B  | ADAM33    |     |          |           | AXL       | FGFR2     | WFDC1    | SFRP1    |
| NTNG1     | MPPED2    |     |          |           | CD74      | HLX       | ID4      | TENM2    |
| KLRG2     | CAMKV     |     |          |           | DOCK6     | DLC1      | BCAR1    | WNT9A    |
| ROR2      | A1CF      |     |          |           | KYNU      | MYCL      | SMOC2    | CXCL10   |
| AXIN2     | LINC00346 |     |          |           | AHNAK2    | CLNK      | PDZRN4   | TRH      |
| RBMXL2    | HES4      |     |          |           | RNASE1    | MGLL      | FER1L6   | CACNA2D1 |
| CHN1      | OR10R2    |     |          |           | ESM1      | MMRN1     | VWA1     | CHRNA7   |
| XKR7      | MOCS1     |     |          |           | CSPG4     | HLA-DRB1  | CYGB     | EGF      |
| THEMIS    | HEY2      |     |          |           | LILRA4    | ZC3H12C   | ALOX15B  | LDHAL6B  |
| LIM2      | CHST3     |     |          |           | DNAJC5B   | PPP2R2B   | KIF17    | AMBN     |
| CPS1      | RBM24     |     |          |           | PLD4      | SDK2      | SORCS1   | FCN2     |
| GPR157    | KCNS3     |     |          |           | GAPT      | PTGS1     | MACC1    | CCL8     |
| RIPK4     | LPIN3     |     |          |           | B3GNT7    | UNC79     | MROH7    | MMP7     |
| PTMS      | SLC6A15   |     |          |           | NPR3      | SMIM3     | FAT3     | PDGFC    |
| KCNC2     | TBX20     |     |          |           | LPO       | ITGAD     | GGT5     | TWIST1   |
| SEPT8     | AVPR1A    |     |          |           | CCR2      | TMEM37    | HOXC11   | SLC7A10  |
| CD1B      | ANKFN1    |     |          |           | EMX2      | COL4A2    | TDO2     | RHOJ     |
| OR2D3     | NRXN3     |     |          |           | VWF       | CLEC2A    | NPTX1    | TMEM196  |
| SYDE2     | TMEM155   |     |          |           | FOLR2     | TJP1      | SLC22A10 | PCDH17   |
| FTCDNL1   | PTPN13    |     |          |           | APBA1     | CUX2      | RNF180   | GJA1     |
| SIX5      | LRRIQ1    |     |          |           | IGFBP3    | TNS3      | MPV17L   | INSL5    |
| JAKMIP1   | ADAMTSL1  |     |          |           | LILRB4    | KCNK10    | UTS2B    | EQTN     |
| DAB2IP    | FAM183A   |     |          |           | SLC8A3    | CDH11     | DCN      | DRGX     |
| SCN1A     | MUC13     |     |          |           | ALDH1A3   | ATP8B4    | KDR      | FOXF1    |
| NOTCH3    | NLGN4X    |     |          |           | LIMCH1    | PRLR      | OLIG2    | MMP16    |
| ADAMTSL3  | BMPR1B    |     |          |           | KIF26B    | KCNJ8     | PPIC     | CYP2C8   |
| CPA4      | MAP2      |     |          |           | CFD       | APOD      | CPN2     | COL2A1   |
| PAK3      | SLC1A1    |     |          |           | HLA-DPA1  | COL14A1   | PDGFRA   | CDH10    |
| KIAA2022  | ABCG4     |     |          |           | IGFBP7    | GABRA2    | ITGA8    | PF4V1    |
| KCNG3     | TFAP2C    |     |          |           | TNNI2     | MEGF10    | MB       |          |
| TTC16     |           |     |          |           | LILRB5    | EBI3      | TMEM47   |          |
| APBB2     |           |     |          |           | CMKLR1    | TTLL10    | CHRFAM7A |          |

**Table S4. Clinical and genetic differences between adult and pediatric T-ALL patients**

| Characteristics           | adult (n=61) | childhood (n=69) | P value |
|---------------------------|--------------|------------------|---------|
| <b>WBC count</b>          |              |                  | 0.004   |
| >=100×10 <sup>9</sup> /L  | 15 (24.6%)   | 34 (49.3%)       |         |
| <100×10 <sup>9</sup> /L   | 46 (75.4%)   | 35 (50.7%)       |         |
| <b>ETP</b>                | 17 (27.9%)   | 7 (10.1%)        | 0.009   |
| <b>Complete Remission</b> | 46 (75.4%)   | 64 (92.8%)       | 0.006   |
| <b>Fusion genes</b>       |              |                  |         |
| <i>SET-NUP214</i>         | 8 (13.1%)    | 2 (2.9%)         | 0.029   |
| <b>Over-expression</b>    |              |                  |         |
| <i>LYL1</i>               | 19 (31.1%)   | 10 (14.5%)       | 0.023   |
| <i>TAL1</i>               | 8 (13.1%)    | 22 (31.9%)       | 0.011   |
| <i>SLC17A9</i> -short     | 17 (27.9%)   | 41 (59.4%)       | <0.001  |
| <i>HOXA</i>               | 33 (54.1%)   | 17 (24.6%)       | 0.001   |
| <i>MEF2C</i>              | 26 (42.6%)   | 7 (10.1%)        | <0.001  |
| <b>Mutations</b>          |              |                  |         |
| Signaling Pathways (C2)   | 47 (77.05%)  | 30 (43.5%)       | <0.001  |
| Epigenetic Factors (C3)   | 47 (77.0%)   | 31 (44.9%)       | <0.001  |

## Reference:

1. Larson RA, Fretzin MH, Dodge RK, & Schiffer CA (1998) Hypersensitivity reactions to L-asparaginase do not impact on the remission duration of adults with acute lymphoblastic leukemia. *Leukemia* 12(5):660-665.
2. Thomas DA, *et al.* (2010) Chemoimmunotherapy with a modified hyper-CVAD and rituximab regimen improves outcome in de novo Philadelphia chromosome-negative precursor B-lineage acute lymphoblastic leukemia. *Journal of clinical oncology : official journal of the American Society of Clinical Oncology* 28(24):3880-3889.
3. Gu LJ, *et al.* (2008) Clinical outcome of children with newly diagnosed acute lymphoblastic leukemia treated in a single center in Shanghai, China. *Leukemia & lymphoma* 49(3):488-494.
4. Liu Y, *et al.* (2009) Cost of childhood acute lymphoblastic leukemia care in Shanghai, China. *Pediatric blood & cancer* 53(4):557-562.
5. Liu YF, *et al.* (2016) Genomic Profiling of Adult and Pediatric B-cell Acute Lymphoblastic Leukemia. *EBioMedicine* 8:173-183.
6. Kim D, Langmead B, & Salzberg SL (2015) HISAT: a fast spliced aligner with low memory requirements. *Nature methods* 12(4):357-360.

7. Anders S, Pyl PT, & Huber W (2015) HTSeq--a Python framework to work with high-throughput sequencing data. *Bioinformatics* 31(2):166-169.
8. Nicorici D, *et al.* (2014) FusionCatcher - a tool for finding somatic fusion genes in paired-end RNA-sequencing data. *bioRxiv*.
9. McPherson A, *et al.* (2011) deFuse: an algorithm for gene fusion discovery in tumor RNA-Seq data. *PLoS computational biology* 7(5):e1001138.
10. Lilljebjorn H, *et al.* (2016) Identification of ETV6-RUNX1-like and DUX4-rearranged subtypes in paediatric B-cell precursor acute lymphoblastic leukaemia. *Nature communications* 7:11790.
11. Atak ZK, *et al.* (2013) Comprehensive analysis of transcriptome variation uncovers known and novel driver events in T-cell acute lymphoblastic leukemia. *PLoS genetics* 9(12):e1003997.
12. McKenna A, *et al.* (2010) The Genome Analysis Toolkit: a MapReduce framework for analyzing next-generation DNA sequencing data. *Genome research* 20(9):1297-1303.
13. Dobin A, *et al.* (2013) STAR: ultrafast universal RNA-seq aligner. *Bioinformatics* 29(1):15-21.
14. Koboldt DC, *et al.* (2009) VarScan: variant detection in massively parallel sequencing of individual and pooled samples. *Bioinformatics* 25(17):2283-2285.



15. Wilm A, *et al.* (2012) LoFreq: a sequence-quality aware, ultra-sensitive variant caller for uncovering cell-population heterogeneity from high-throughput sequencing datasets. *Nucleic acids research* 40(22):11189-11201.
16. Jiang L, *et al.* (2015) Exome sequencing identifies somatic mutations of DDX3X in natural killer/T-cell lymphoma. *Nature genetics* 47(9):1061-1066.
17. Kiran A & Baranov PV (2010) DARNED: a DAtabase of RNa EDiting in humans. *Bioinformatics* 26(14):1772-1776.
18. Ramaswami G & Li JB (2014) RADAR: a rigorously annotated database of A-to-I RNA editing. *Nucleic acids research* 42(Database issue):D109-113.
19. Neumann M, *et al.* (2015) Mutational spectrum of adult T-ALL. *Oncotarget* 6(5):2754-2766.
20. Van der Meulen J, Van Roy N, Van Vlierberghe P, & Speleman F (2014) The epigenetic landscape of T-cell acute lymphoblastic leukemia. *The international journal of biochemistry & cell biology* 53:547-557.
21. Girardi T, Vicente C, Cools J, & De Keersmaecker K (2017) The genetics and molecular biology of T-ALL. *Blood* 129(9):1113-1123.

22. Mullighan CG (2014) The genomic landscape of acute lymphoblastic leukemia in children and young adults. *Hematology. American Society of Hematology. Education Program* 2014(1):174-180.
23. Love MI, Huber W, & Anders S (2014) Moderated estimation of fold change and dispersion for RNA-seq data with DESeq2. *Genome biology* 15(12):550.
24. Anders S, Reyes A, & Huber W (2012) Detecting differential usage of exons from RNA-seq data. *Genome research* 22(10):2008-2017.
25. Sonesson C, Matthes KL, Nowicka M, Law CW, & Robinson MD (2016) Isoform prefiltering improves performance of count-based methods for analysis of differential transcript usage. *Genome biology* 17:12.
26. Schwab CJ, *et al.* (2013) Genes commonly deleted in childhood B-cell precursor acute lymphoblastic leukemia: association with cytogenetics and clinical features. *Haematologica* 98(7):1081-1088.
27. Thieme S & Groth P (2013) Genome Fusion Detection: a novel method to detect fusion genes from SNP-array data. *Bioinformatics* 29(6):671-677.
28. Bene MC, *et al.* (1995) Proposals for the immunological classification of acute leukemias. European Group for the Immunological Characterization of Leukemias (EGIL). *Leukemia* 9(10):1783-1786.

29. Alvarnas JC, *et al.* (2015) Acute Lymphoblastic Leukemia, Version 2.2015. *Journal of the National Comprehensive Cancer Network* : *JNCCN* 13(10):1240-1279.
